# Supplementary material for: Outpatient balloon catheter vs inpatient prostaglandin for induction of labour (OBLIGE): a randomised controlled trial
Source: Springer Nature journal article supplement (doi:10.1186/s13063-020-4061-5), 2020-02-17
Supplement: MOESM1 [file 17715910]

# OBLIGE Study Satisfaction Survey

Thank you for participating in the OBLIGE induction of labour study.

We would like to ask you some questions about your satisfaction with the care you received when you had your induction of labour. Information given will be kept strictly confidential.

Date of survey \_\_\_\_\_

## Thinking about how your induction was started this time

### (vaginal medicine and remaining in hospital OR balloon catheter and going home)

Would you choose to be induced again in your next pregnancy?

- Yes  
 No  
 Unsure

If you were to be induced in your next pregnancy, would you choose to start with:

- The same method I had this time  
 A different method

|                                                                            | 1 not at all          | 2                     | 3                     | 4                     | 5                     | 6                     | 7                     | 8                     | 9                     | 10 extremely satisfied |
|----------------------------------------------------------------------------|-----------------------|-----------------------|-----------------------|-----------------------|-----------------------|-----------------------|-----------------------|-----------------------|-----------------------|------------------------|
| How satisfied were you overall with the start of your induction of labour? | <input type="radio"/> | <input type="radio"/> | <input type="radio"/> | <input type="radio"/> | <input type="radio"/> | <input type="radio"/> | <input type="radio"/> | <input type="radio"/> | <input type="radio"/> | <input type="radio"/>  |

Having the vaginal medicine or balloon catheter inserted was:

- Less painful than I expected  
 More painful than I expected  
 As painful as I expected

Overall, my induction of labour was:

- Less painful than I expected  
 More painful than I expected  
 As painful as I expected

## At the following time points, please indicate your level of tiredness or fatigue.

|                                                                    | 1 not at all tired    | 2                     | 3                     | 4                     | 5                     | 6                     | 7                     | 8                     | 9                     | 10 extremely tired    |
|--------------------------------------------------------------------|-----------------------|-----------------------|-----------------------|-----------------------|-----------------------|-----------------------|-----------------------|-----------------------|-----------------------|-----------------------|
| At the start of your induction of labour                           | <input type="radio"/> | <input type="radio"/> | <input type="radio"/> | <input type="radio"/> | <input type="radio"/> | <input type="radio"/> | <input type="radio"/> | <input type="radio"/> | <input type="radio"/> | <input type="radio"/> |
| At the time that you were transferred to labour and birthing suite | <input type="radio"/> | <input type="radio"/> | <input type="radio"/> | <input type="radio"/> | <input type="radio"/> | <input type="radio"/> | <input type="radio"/> | <input type="radio"/> | <input type="radio"/> | <input type="radio"/> |

Approximately how many hours of sleep did you get on the night you had the vaginal medicine or balloon catheter inserted? \_\_\_\_\_

**Please rate whether you agree or disagree with each statement below.**

**(Please tick one option per line)**

|                                                                                                                               | Strongly disagree     | Disagree              | Neither agree or disagree | Agree                 | Strongly Agree        |
|-------------------------------------------------------------------------------------------------------------------------------|-----------------------|-----------------------|---------------------------|-----------------------|-----------------------|
| I was disappointed with how long it took for my labour to start after I had the vaginal medicine or balloon catheter inserted | <input type="radio"/> | <input type="radio"/> | <input type="radio"/>     | <input type="radio"/> | <input type="radio"/> |
| I felt reassured having my induction started in this way                                                                      | <input type="radio"/> | <input type="radio"/> | <input type="radio"/>     | <input type="radio"/> | <input type="radio"/> |
| I felt well supported on the day I had the vaginal medicine or balloon catheter inserted                                      | <input type="radio"/> | <input type="radio"/> | <input type="radio"/>     | <input type="radio"/> | <input type="radio"/> |
| I had a good quality sleep on the night I had the vaginal medicine or balloon catheter inserted                               | <input type="radio"/> | <input type="radio"/> | <input type="radio"/>     | <input type="radio"/> | <input type="radio"/> |
| It was convenient for me to start my labour induction in this way                                                             | <input type="radio"/> | <input type="radio"/> | <input type="radio"/>     | <input type="radio"/> | <input type="radio"/> |

Do you have any other comments about your experience?

---
