# Supplementary material for: Outpatient balloon catheter vs inpatient prostaglandin for induction of labour (OBLIGE): a randomised controlled trial
Source: Springer Nature journal article supplement (doi:10.1186/s13063-020-4061-5), 2020-02-17
Supplement: MOESM2 [file 17715910]

# Health Professional Survey

The OBLIGE research study on induction of labour has been up and running at Auckland DHB for over 6 months, and it is time to ask for your feedback about the study. It is for staff midwives and doctors at ADHB, and for Lead Maternity Carers; whether you have had several women in the study, or haven't even heard of it! By answering the following questions, we assume you consent to participate in this staff satisfaction survey. It should take only 5 minutes, and we appreciate any extra comments you wish to make. The results are anonymous. Thank you in advance for your time.

Dr Michelle Wise, Principal Investigator, OBLIGE Study  
Senior Lecturer, Department of Obstetrics and Gynaecology, FMHS, University of Auckland

---

Thank you for contributing to the OBLIGE study. We would like to ask you some questions about the impact on you of having some women start their induction with a balloon as an outpatient. Your answers will be kept strictly confidential.

## I. This section refers to the practice of induction of labour using a balloon

- 
- a. In your clinical role, how has the practice of balloon induction contributed to your satisfaction:
- improved my satisfaction a lot
  - improved my satisfaction a little
  - no difference
  - decreased my satisfaction a little
  - decreased my satisfaction a lot
  - not applicable

- 
- b. How has the practice of balloon induction affected your stress at work:
- increased my stress a lot
  - increased my stress a little
  - no difference
  - decreased my stress a little
  - decreased my stress a lot
  - not applicable

- 
- c. How has the practice of balloon induction affected your workload:
- increased my workload a lot
  - increased my workload a little
  - no difference
  - decreased my workload a little
  - decreased my workload a lot
  - not applicable

- 
- d. In a typical work week, roughly how many balloon inductions would you be directly involved with: \_\_\_\_\_

- 
- e. Over the past 6 months, roughly how many balloon inductions were you directly involved with: \_\_\_\_\_



**4. Please provide comments about your experience so far with outpatient balloon induction as part of the OBLIGE research trial:**

Things that I like about it

---

Things that I don't like about it

---

**5. Please provide comments about recruitment for the OBLIGE research trial:**

Things that can be barriers to recruiting women

---

Things that can help with recruiting women

---
